# Supplementary material for: Preparation of TiO2:TiN composite nanowires as a support with improved long-term durability in acidic medium for polymer electrolyte fuel cells
Source: Royal Society of Chemistry journal article supplement (doi:10.1039/c7nj00374a), 2017-01-01
Supplement: c7nj00374a1.pdf [file c7nj00374a1.pdf]

**Preparation of  $\text{TiO}_2\text{:TiN}$  composite nanowires as support with improved long-term durability in acidic medium for polymer electrolyte fuel cells**

P. Dhanasekaran<sup>a</sup>, S. Vinod Selvaganesh<sup>a</sup> and S. D. Bhat\*

<sup>a</sup>*CSIR-Central Electrochemical Research Institute (CECRI), CSIR-Madras Complex, Chennai - 600113, Tamil Nadu, India.*

**Supporting Information**

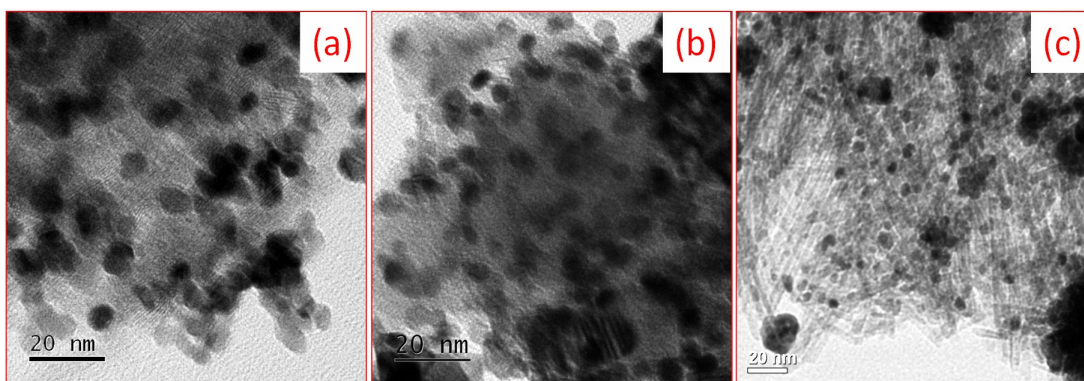

**Fig. 1S** (a) High magnified TEM image (a) Pt/TiO<sub>2</sub>-NW, (b) Pt/TiN and Pt/TiO<sub>2</sub>:TiN 2 composite nanowires.

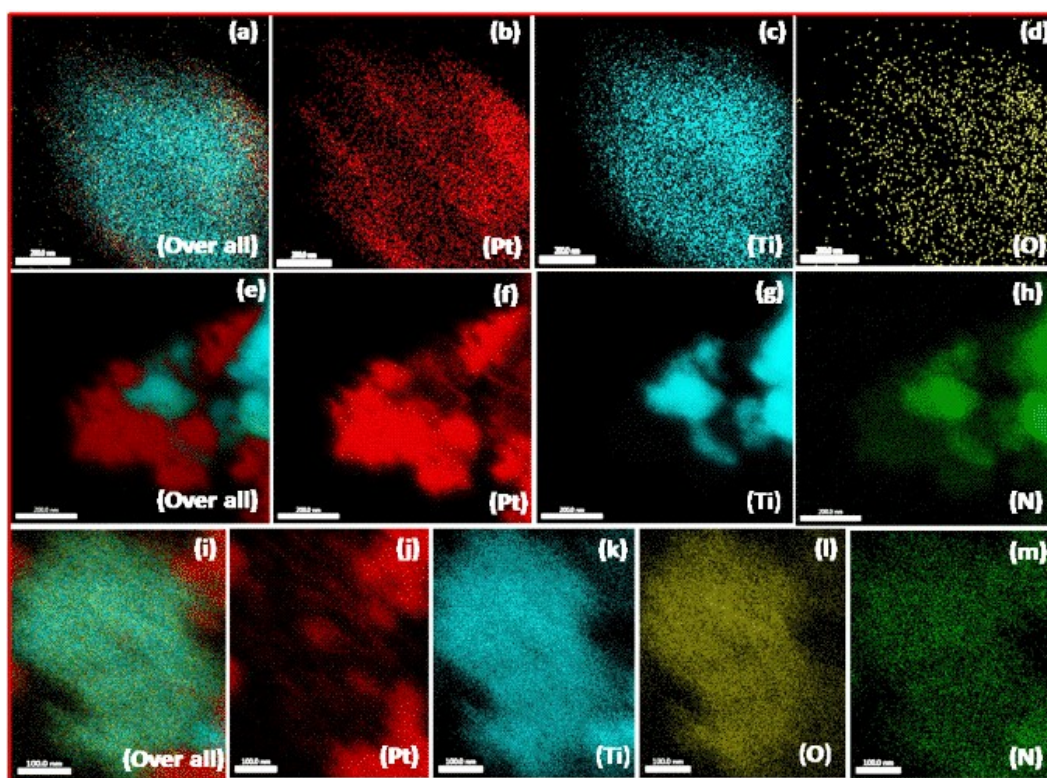

**Fig. 2S** (a-d) STEM mapping for Pt/TiO<sub>2</sub>-NW, (e-h) Pt/TiN and (i-m) Pt/TiO<sub>2</sub>:TiN 2 composite nanowires.

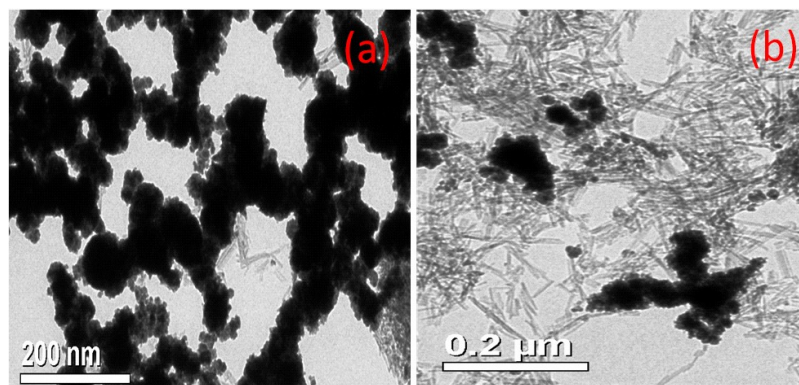

**Fig. 3S** TEM images for different region of Pt deposited on  $\text{TiO}_2\text{:TiN}$  2P (simple physically mixed sample).

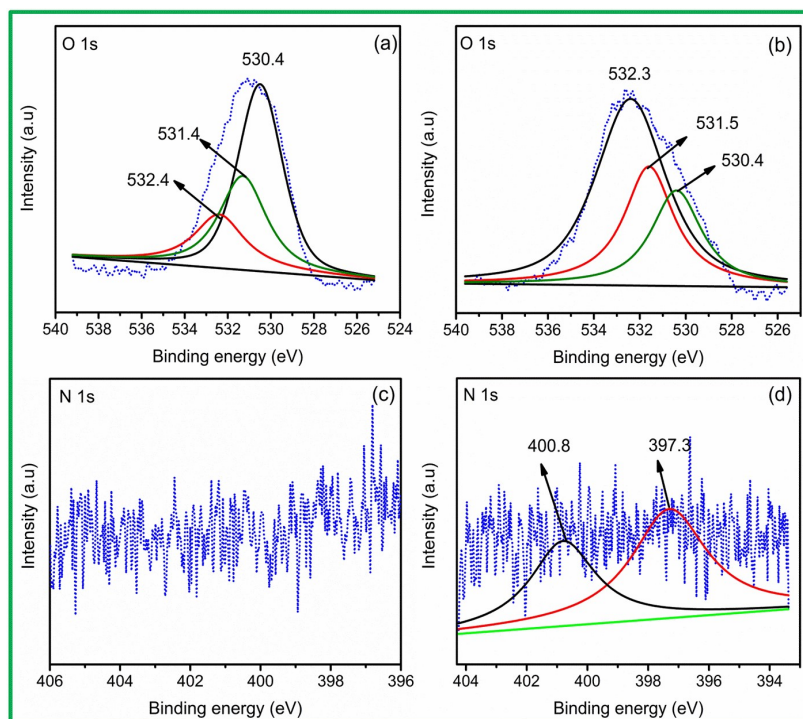

**Fig. 4S** XPS spectrum of Pt/TiO<sub>2</sub> and Pt/TiO<sub>2</sub>:TiN<sub>2</sub> composite nanowires. (a & b) Oxygen 1s state and (c & d) Nitrogen 1s orbital state.

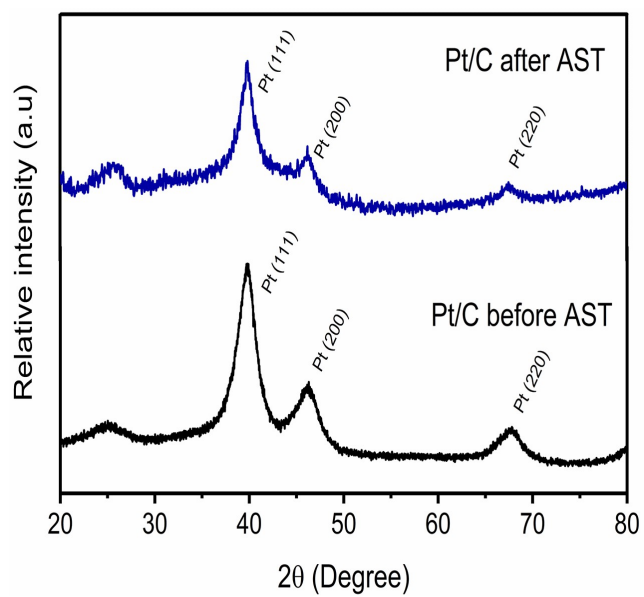

**Fig. 5S** XRD pattern for Pt/C electrocatalyst before and after AST.

The Pt crystallite size for Pt/C is observed to be 3.5 nm before AST and after AST it increased to 9 nm which is calculated from Pt (111) plane using Scherrer formula.

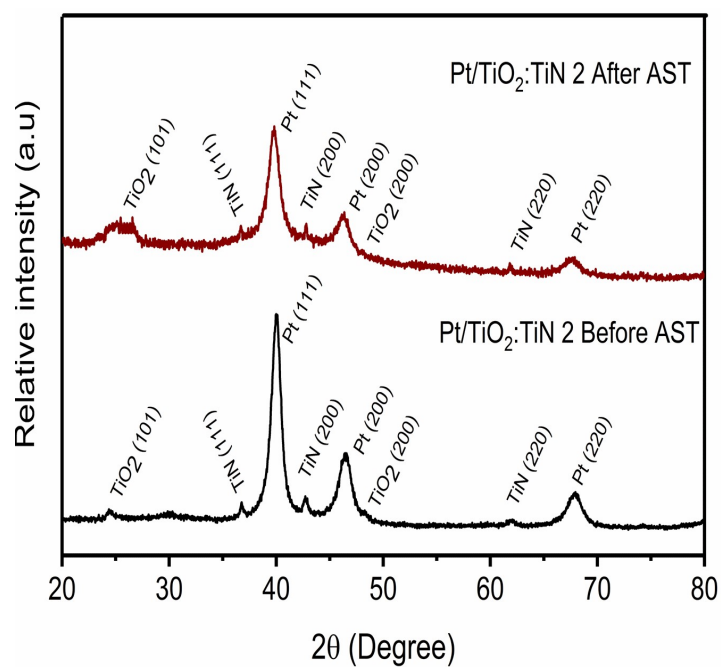

**Fig. 6S** XRD pattern for Pt/TiO<sub>2</sub>:TiN 2 composite nanowires before and after AST.

Before AST for Pt/TiO<sub>2</sub>:TiN 2 composite nanowires, the Pt crystallite size is observed to be 5 nm and after AST, the particle size increased to 7 nm.



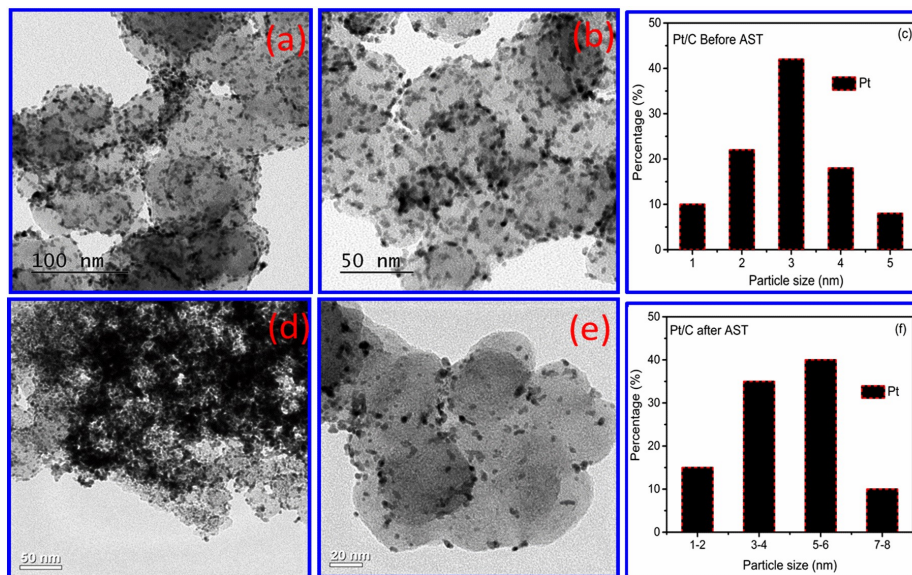

**Fig. 7S** TEM micrographs and Pt particle size histogram for Pt/C: (a-c) before and (d-f) after AST.

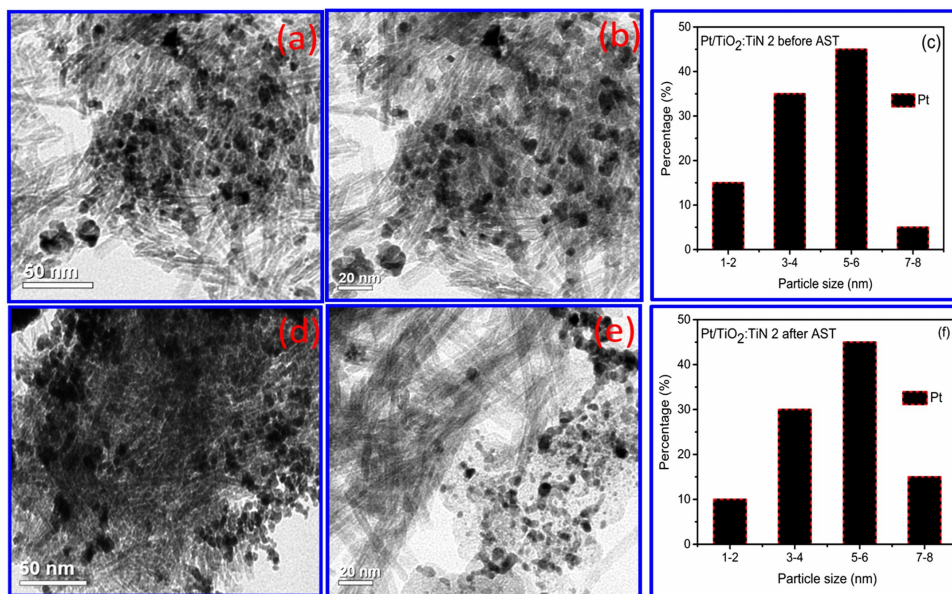

**Fig. 8S** TEM image and Pt particle size histogram for Pt/TiO<sub>2</sub>:TiN 2 composite electrocatalyst (a-c) before and (d-f) after AST.



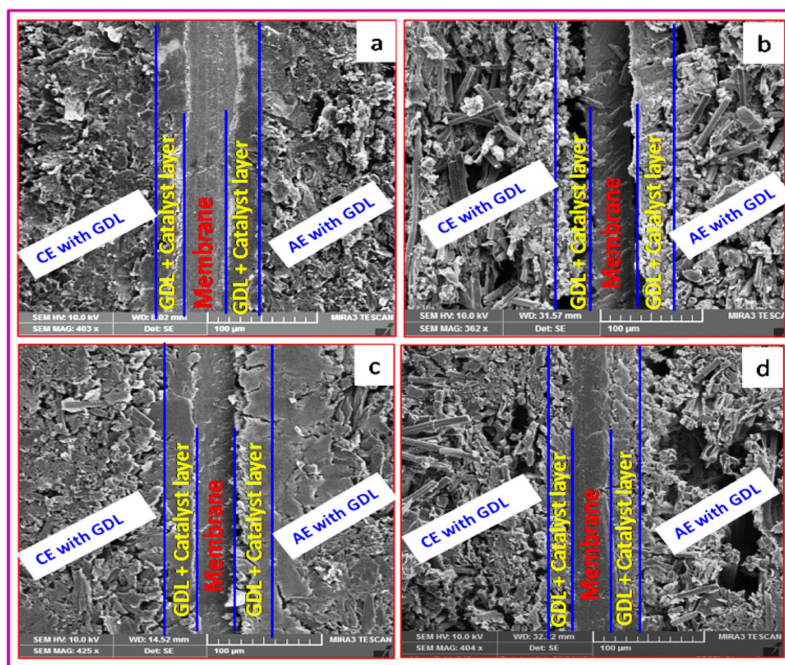

**Fig. 9S** FE-SEM cross section image: (a & b) before and after AST for Pt/C and (c & d) before and after AST for Pt/TiO<sub>2</sub>:TiN 2 composite nanowires (AE & CE for anode and cathode electrodes).
